# Supplementary material for: Identification of miR414 and Expression Analysis of Conserved miRNAs from Stevia rebaudiana
Source: PubMed Central journal article supplement — Genomics Proteomics Bioinformatics. 2012 Jan 28;9(6):211–7. doi: 10.1016/S1672-0229(11)60024-7 (PMC5054151; doi:10.1016/s1672-0229(11)60024-7), 2012-01-28
Supplement: mmc1.pdf [file mmc1.pdf]

## Supplementary Material

Guleria, P. and Yadav, S.K. 2011. Identification of miR414 and expression analysis of conserved miRNAs from *Stevia rebaudiana*. *Genomics Proteomics Bioinformatics* 9(6): 211-217.

DOI: 10.1016/S1672-0229(11)60024-7

Tables S1-S4

**Table S1** miRNAs in miRBase which are homologous to miR414 predicted from *Stevia*

| <b>Plant species</b>                                      | <b>EST name</b>                                                            | <b>Location</b> | <b>Sequence</b>       | <b>Homology</b> |
|-----------------------------------------------------------|----------------------------------------------------------------------------|-----------------|-----------------------|-----------------|
| <i>Stevia rebaudiana</i>                                  | gi 16948646                                                                | 5'              | ucaucuucaucaucaucguca |                 |
| <i>Oryza sativa</i>                                       | PUT-163a- <i>Oryza_sativa</i> -35580                                       | 5'              | ucaucuucaucuucaucguca | 95%             |
| <i>Raphanus raphanistrum</i><br><i>subsp raphanistrum</i> | PUT-165a- <i>Raphanus_raphanistrum</i><br><i>subsp_raphanistrum</i> -27094 | 5'              | caucuucaucaucaucguc   | 100%            |

**Table S2. List of potential miR414 target proteins with GO terms**

| Targeted protein                                  | Function                                                              | Targeted gene | GO annotations                                                                                                                                                                             |
|---------------------------------------------------|-----------------------------------------------------------------------|---------------|--------------------------------------------------------------------------------------------------------------------------------------------------------------------------------------------|
| DNA-binding storekeeper protein                   | Transcription regulator                                               | At5g14280.1   | Transcriptional regulator activity (GO:0030528)<br>Molecular function unknown (GO:0003674)<br>Integral to membrane (GO:0016021)<br>Biological process unknown (GO:0008150)                 |
|                                                   |                                                                       | At4g00270.1   | Transcriptional regulator activity (GO:0030528)<br>Molecular function unknown (GO:0003674)<br>Chloroplast (GO:0009507)<br>Biological process unknown (GO:0008150)                          |
| Zinc finger (C2H2 type) family protein            | Transcription regulator                                               | At4g31420.1   | Transcription factor activity (GO:0003700)<br>Regulation of transcription (GO:0045449)<br>Intracellular (GO:0005622)                                                                       |
|                                                   |                                                                       | At3g48430.1   | Transcription factor activity (GO:0003700)<br>Intracellular (GO:0005622)<br>Biological process unknown (GO:0008150)                                                                        |
|                                                   |                                                                       | At5g56200.1   | Nucleic acid binding (GO:0003676)<br>Intracellular (GO:0005622)<br>Zinc ion binding (GO:0008270)<br>Transcription factor activity (GO:0003700)                                             |
|                                                   |                                                                       | At3g20880.1   | Intracellular (GO:0005622)<br>Regulation of transcription (GO:0045449)<br>Zinc ion binding (GO:0008270)<br>Transcription factor activity (GO:0003700)<br>Nucleic acid binding (GO:0003676) |
| Pentatricopeptide repeat (PPR)-containing protein | Sequence specific RNA binding, role in post-transcriptional processes | At2g40240.1   | Biological process unknown (GO:0008150)<br>Molecular function unknown (GO:0003674)                                                                                                         |
|                                                   |                                                                       | At3g49710.1   | Biological process unknown (GO:0008150)<br>Binding (GO:0005488)                                                                                                                            |

|                                        |         |        |                                                                     |             |                                                                                                            |                                                                                                                                                                                |
|----------------------------------------|---------|--------|---------------------------------------------------------------------|-------------|------------------------------------------------------------------------------------------------------------|--------------------------------------------------------------------------------------------------------------------------------------------------------------------------------|
|                                        |         |        |                                                                     |             | Cellular component unknown (GO:0005575)                                                                    |                                                                                                                                                                                |
|                                        |         |        |                                                                     | At5g16860.1 | Binding (GO:0005488)                                                                                       |                                                                                                                                                                                |
|                                        |         |        |                                                                     | At3g59040.1 | Binding (GO:0005488)<br>Chloroplast (GO:0009507)<br>Biological process unknown (GO:0008150)                |                                                                                                                                                                                |
|                                        |         |        |                                                                     | At5g04810.1 | Nucleic acid binding (GO:0003676)<br>Binding (GO:0005488)<br>Nucleotide binding (GO:0000166)               |                                                                                                                                                                                |
|                                        |         |        |                                                                     | At3g18970.1 | Binding (GO:0005488)<br>Biological process unknown (GO:0008150)                                            |                                                                                                                                                                                |
|                                        |         |        |                                                                     | At2g34400.1 | Cellular component unknown (GO:0005575)<br>Binding (GO:0005488)<br>Biological process unknown (GO:0008150) |                                                                                                                                                                                |
|                                        |         |        |                                                                     | At1g56570.1 | Binding (GO:0005488)                                                                                       |                                                                                                                                                                                |
|                                        |         |        |                                                                     | At3g49140.1 | Binding (GO:0005488)                                                                                       |                                                                                                                                                                                |
| Ubiquitin-conjugating<br>(UBC4) E2     | enzyme  | 4      | Post-transcriptional<br>modification,<br>amino acid ligase activity | protein     | At5g41340.1                                                                                                | Ubiquitin dependent protein catabolic process (GO:0006511)<br>Ubiquitin protein ligase activity (GO:0004842)                                                                   |
|                                        |         |        |                                                                     |             | At3g15355.1                                                                                                | Small conjugating protein ligase activity (GO:0019787)<br>Protein modification process (GO:0006464)<br>Cellular component unknown (GO:0005575)<br>Ubiquitin cycle (GO:0006512) |
| SWIB<br>domain-containing protein      | complex | BAF60b | ATP-dependent<br>chromatin-remodelling proteins                     |             | At5g08430.1                                                                                                | Nucleus (GO:0005634)<br>Molecular function unknown (GO:0003674)<br>Biological process unknown (GO:0008150)                                                                     |
| Importin beta-2 subunit family protein |         |        | Intracellular protein transporter                                   |             | At2g31660.1                                                                                                | Nucleus (GO:0005634)<br>Cytoplasm (GO:0005737)<br>Nuclear pore (GO:0005643)<br>Protein import to nucleus, docking (GO:0000059)                                                 |
|                                        |         |        |                                                                     |             | At4g27640.1                                                                                                | Protein transporter activity (GO:0008565)                                                                                                                                      |

|                                                       |                                                                           |             |                                                                                                                                                                                                                                            |
|-------------------------------------------------------|---------------------------------------------------------------------------|-------------|--------------------------------------------------------------------------------------------------------------------------------------------------------------------------------------------------------------------------------------------|
|                                                       |                                                                           |             | Nucleus (GO:0005634)<br>Nuclear pore (GO:0005643)<br>Cytoplasm (GO:0005737)<br>Protein import into nucleus, docking (GO:0000059)                                                                                                           |
| Nucleosome assembly protein (NAP)                     | Histone chaperones, regulate gene expression and cellular differentiation | At2g19480.1 | DNA binding (GO:0003677)<br>Nucleosome assembly (GO:0006334)<br>Nucleus (GO:0005634)                                                                                                                                                       |
|                                                       |                                                                           | At3g13782.1 | DNA binding (GO:0003677)<br>Nucleosome assembly (GO:0006334)<br>Nucleus (GO:0005634)                                                                                                                                                       |
|                                                       |                                                                           | At5g56950.1 | DNA binding (GO:0003677)<br>Nucleosome assembly (GO:0006334)<br>Nucleus (GO:0005634)                                                                                                                                                       |
| Protein kinase family protein                         | Protein phosphorylation ability                                           | At3g01840.1 | Cell wall catabolic process (GO:0016998)<br>Protein amino acid phosphorylation (GO:0006468)<br>Kinase activity (GO:0016301)<br>Endomembrane system (GO:0012505)                                                                            |
|                                                       |                                                                           | At5g13530.1 | Developmental growth (GO:0048589)<br>Protein binding (GO:0005515)<br>Protein kinase activity (GO:0004672)<br>Ubiquitin protein ligase (GO:0004842)<br>Abscisic acid mediated signaling (GO:0009738)<br>Protein ubiquitination (GO:0016567) |
|                                                       |                                                                           | At5g28080.1 | Kinase activity (GO:0016301)                                                                                                                                                                                                               |
|                                                       |                                                                           | At1g13350.1 | Cytoplasm (GO:0005737)<br>Protein amino acid phosphorylation (GO:0006468)<br>Nucleus (GO:0005634)<br>Protein kinase activity (GO:0004672)                                                                                                  |
|                                                       |                                                                           | At3g53640.1 | Protein amino acid phosphorylation (GO:0006468)<br>Nucleus (GO:0005634)<br>Kinase activity (GO:0016301)                                                                                                                                    |
| Expressed protein similar to 6b-interacting protein 1 | Transcription factor                                                      | At5g05550.1 | Regulation of transcription (GO:0045449)<br>Cellular component unknown (GO:0005575)                                                                                                                                                        |

|                                                            |        |                                                           |  |                            |                                                                                                                                                           |
|------------------------------------------------------------|--------|-----------------------------------------------------------|--|----------------------------|-----------------------------------------------------------------------------------------------------------------------------------------------------------|
|                                                            |        |                                                           |  |                            | Transcription factor activity (GO:0003700)                                                                                                                |
|                                                            |        |                                                           |  | At3g11100.1                | Cellular component unknown (GO:0005575)<br>Transcription factor activity (GO:0003700)<br>Regulation of transcription (GO:0045449)                         |
| Tetratricopeptide (TPR)-containing protein                 | repeat | Structural motif, to mediate protein-protein interactions |  | At4g37210.1<br>At4g37210.2 | Biological process unknown (GO:0008150)<br>Binding (GO:0005488)<br>Cellular component unknown (0005575)                                                   |
| Structural maintenance of chromosomes (SMC) family protein |        | Role in chromosome structural changes                     |  | At2g27170.1                | ATP binding (GO:0005524)<br>Nucleus (GO:0005634)<br>Chromosome segregation (GO:0007059)                                                                   |
| Myb family transcription factor                            |        | Transcription factor                                      |  | At5g41020.1                | Transcription factor activity (GO:0003700)<br>DNA binding (GO:0003677)<br>Regulation of transcription (GO:0045449)<br>Nucleus (GO:0005634)                |
|                                                            |        |                                                           |  | At4g18770.1                | Nucleus (GO:0005634)<br>Regulation of transcription, DNA dependent (GO:0006355)<br>DNA binding (GO:0003677)                                               |
|                                                            |        |                                                           |  | At3g18100.1                | Regulation of transcription (GO:0045449)<br>Transcription factor activity (GO:0003700)<br>Nucleus (GO:0005634)                                            |
|                                                            |        |                                                           |  | At3g18100.2                | Nucleus (GO:0005634)<br>Transcription factor activity (GO:0003700)                                                                                        |
|                                                            |        |                                                           |  | At3g10580.1                | Transcription factor activity (GO:0003700)<br>Regulation of transcription, DNA dependent (GO:0006355)<br>DNA binding (GO:0003677)<br>Nucleus (GO:0005634) |
|                                                            |        |                                                           |  | At5g23000.1                | Regulation of transcription, DNA dependent (GO:0006355)<br>Transcription factor activity (GO:0003700)<br>DNA binding (GO:0003677)<br>Nucleus (GO:0005634) |
|                                                            |        |                                                           |  | At2g03470.1                | Regulation of transcription (GO:0045449)<br>Nucleus (GO:0005634)                                                                                          |

|                                                            |                                       |                                                                                        |  |  |                                                                                                                                                                              |
|------------------------------------------------------------|---------------------------------------|----------------------------------------------------------------------------------------|--|--|------------------------------------------------------------------------------------------------------------------------------------------------------------------------------|
|                                                            |                                       |                                                                                        |  |  | DNA binding (GO:0003677)                                                                                                                                                     |
| Endo/excinuclease amino terminal domain-containing protein | Nuclease activity, role in DNA repair | At2g30350.1<br>At2g30350.2                                                             |  |  | Intracellular (GO:0005622)<br>DNA repair (GO:0006281)<br>Nuclease activity (GO:0004518)                                                                                      |
| WRKY family transcription factor                           | Transcription factor                  | At3g01080.1                                                                            |  |  | Regulation of defense response (GO:0031347)<br>Transcription factor activity (GO:0003700)<br>Nucleus (GO:0005634)<br>Regulation of transcription, DNA dependent (GO:0006355) |
|                                                            |                                       | At5g56270.1                                                                            |  |  | Regulation of transcription, DNA dependent (GO:0006355)<br>Nucleus (GO:0005634)<br>Transcription factor activity (GO:0003700)                                                |
|                                                            |                                       | At3g62340.1                                                                            |  |  | Nucleus (GO:0005634)<br>Transcription factor activity (GO:0003700)<br>Regulation of transcription, DNA dependent (GO:0006355)                                                |
|                                                            |                                       | At1g18860.1                                                                            |  |  | Nucleus (GO:0005634)<br>Transcription factor activity (GO:0003700)<br>Regulation of transcription, DNA dependent (GO:0006355)                                                |
| Transducin family protein                                  | Nucleotide binding activity           | At3g21060.1<br>At5g23730.1                                                             |  |  | Nucleotide binding (GO:0000166)<br>Heterotrimeric G-protein complex (GO:0005834)<br>Biological process unknown (GO:0008150)                                                  |
|                                                            |                                       | At4g31160.1<br>At5g58760.1<br>At2g19540.1<br>At4g18905.1<br>At4g38480.1<br>At5g14050.1 |  |  | Nucleotide binding (GO:0000166)<br>Cellular component unknown (GO:0005575)                                                                                                   |
|                                                            |                                       | At5g11240.1                                                                            |  |  | Nucleotide binding (GO:0000166)<br>Endomembrane system (GO:0012505)                                                                                                          |
|                                                            |                                       | At4g05410.1                                                                            |  |  | Mitochondrial fission (GO:0000266)<br>Nucleotide binding (GO:0000166)<br>Anaphase promoting complex (GO:0005680)<br>Small nucleolar ribonucleoprotein complex (GO:0005732)   |

|                                                    |                                                                |                            |  |  |                                                                                                                                                                                                                                                 |
|----------------------------------------------------|----------------------------------------------------------------|----------------------------|--|--|-------------------------------------------------------------------------------------------------------------------------------------------------------------------------------------------------------------------------------------------------|
|                                                    |                                                                |                            |  |  | Nucleic acid binding (GO:0003676)                                                                                                                                                                                                               |
| 26S proteasome AAA-atpase subunit                  | ATP dependent hydrolase, post-translational modifications      | At3g05530.1                |  |  | ATPase activity (GO:0016887)<br>Nucleus (GO:0005634)<br>Ubiquitin dependent protein catabolic process (GO:0006511)<br>Calmodulin binding (GO:0005516)<br>Proteasome regulatory particle, base subcomplex (GO:0008540)<br>Cytoplasm (GO:0005737) |
| Histone deacetylase family protein                 | Deacetylation in histone modification                          | At3g18520.1<br>At3g18520.2 |  |  | Histone deacetylation (GO:0016575)<br>Histone deacetylases activity (GO:0004407)<br>Intracellular (GO:0005622)                                                                                                                                  |
|                                                    |                                                                | At3g44750.1                |  |  | Polarity specification of adaxial/abaxial axis (GO:0009944)<br>Nucleic acid binding (GO:0003676)<br>Nucleolus (GO:0005730)<br>Zinc ion binding (GO:0008270)                                                                                     |
| EXS family protein / ERD1/XPR1/SYG1 family protein | Cellular response to phosphate starvation                      | At1g69480.1                |  |  | Biological process unknown (GO:0008150)<br>Integral to membrane (GO:0016021)<br>Molecular function unknown (GO:0003674)                                                                                                                         |
| Bzip transcription factor family protein           | Transcription factor                                           | At1g42990.1                |  |  | Regulation of transcription, DNA dependent (GO:0006355)<br>Transcription factor activity (GO:0003700)<br>DNA binding (GO:0003677)<br>Nucleus (GO:0005634)<br>Unfolded protein response (GO:0030968)                                             |
| Sas10/U3 ribonucleoprotein (Utp) family protein    | Protein synthesis/modification                                 | At2g43650.1                |  |  | Biological process unknown (GO:0008150)<br>Cellular component unknown (GO:0005575)<br>Molecular function unknown (GO:0003674)                                                                                                                   |
| SUMO activating enzyme 1a (SAE1a)                  | Protein modification, small protein activating enzyme activity | At4g24940.1                |  |  | SUMO activating enzyme activity (GO:0019948)<br>Protein sumoylation (GO:0016925)                                                                                                                                                                |
| DNA-damage-repair/toleration protein               | DNA repair                                                     | At1g30480.1                |  |  | Nucleic acid binding (GO:0003676)<br>Nucleotide binding (GO:0000166)<br>Nucleus (GO:0005634)<br>Cytoplasm (GO:0005737)                                                                                                                          |
| PWWP domain-containing protein                     | Cell growth and differentiation, protein-protein interactions  | At5g40340.1                |  |  | Cellular component unknown (GO:0005575)<br>Molecular function unknown (GO:0003674)                                                                                                                                                              |
|                                                    |                                                                | At5g23150.1                |  |  | Regulation of timing of vegetative to reproductive phase (GO:0048510) Maintenance of floral organ identity                                                                                                                                      |



|                                                        |                                                                                                      |                                                          |                                                                                                                                                                              |
|--------------------------------------------------------|------------------------------------------------------------------------------------------------------|----------------------------------------------------------|------------------------------------------------------------------------------------------------------------------------------------------------------------------------------|
|                                                        |                                                                                                      |                                                          | (GO:0048497) Negative regulation of flower development<br>(GO:0009910) Transcription factor activity (GO:0003700)                                                            |
| DNA mismatch repair protein                            | DNA repair                                                                                           | At4g02070.1                                              | Damaged DNA binding (GO:0003684)<br>Chloroplast (GO:0009507)<br>Mismatch repair (GO:0006298)                                                                                 |
|                                                        |                                                                                                      | At4g02460.1                                              | Mismatch repair (GO:0006298)<br>ATP binding (GO:0005524)                                                                                                                     |
| SKP1 family protein                                    | Ubiquitination of proteins involved in cell cycle progression, signal transduction and transcription | At5g59140.1                                              | Biological process unknown (GO:0008150)<br>Cellular component unknown (GO:0005575)<br>Molecular function unknown (GO:0003674)                                                |
| SET domain-containing protein                          | Histone methyltransferases (hmtases)                                                                 | At1g04050.1                                              | Chromatin modification (GO:0016568)<br>Nucleolus (GO:0005730)<br>Histone-lysine N-methyltransferase activity (GO:0018024)<br>Zinc ion binding (GO:0008270)                   |
| Heat shock transcription factor                        | Transcription factor                                                                                 | At2g41690.1                                              | Regulation of transcription, DNA dependent (GO:0006355)<br>DNA binding (GO:0003677)<br>Transcription factor activity (GO:0003700)<br>Nucleus (GO:0005634)                    |
| Ulp1 protease family protein                           | Proteolysis, cysteine type peptidase activity                                                        | At1g10570.1<br>At1g60220.1<br>At1g10570.2<br>At4g33620.1 | Cellular component unknown (GO:0005575)<br>Cysteine-type peptidase activity (GO:0008234)<br>Proteolysis (GO:0006508)                                                         |
| Calmodulin-binding protein                             | Signal transduction                                                                                  | At5g57580.1                                              | Calmodulin binding (GO:0005516)                                                                                                                                              |
|                                                        |                                                                                                      |                                                          | Biological process unknown (GO:0008150)<br>Cellular component unknown (GO:0005575)                                                                                           |
| Transcriptional factor B3 family protein               | Transcription factor                                                                                 | At3g53310.1                                              | Endomembrane system (GO:0012505)<br>Regulation of transcription, DNA dependent (GO:0006355)<br>DNA binding (GO:0003677)                                                      |
|                                                        |                                                                                                      | At4g31610.1<br>At5g57720.1                               | Transcription factor activity (GO:0003700)<br>DNA binding (GO:0003677)<br>Cellular component unknown (GO:0005575)<br>Regulation of transcription, DNA dependent (GO:0006355) |
| Eif4-gamma/eif5/eif2-epsilon domain-containing protein | Translation initiators                                                                               | At2g34970.1                                              | Translation initiation factor (GO:0003743)<br>Regulation of translational initiation (GO:0006446)                                                                            |

|                                                |                                                                                                                                                                            |                                                          |                                                                                                                                                                                                                         |
|------------------------------------------------|----------------------------------------------------------------------------------------------------------------------------------------------------------------------------|----------------------------------------------------------|-------------------------------------------------------------------------------------------------------------------------------------------------------------------------------------------------------------------------|
| ABC transporter protein                        | Translocation of various substrates across membranes and non-transport-related processes such as translation of RNA and DNA repair                                         | At3g30842.1                                              | ATP binding (GO:0005524)<br>Nucleotide binding (GO:0000166)<br>Multidrug transport (GO:0006855)<br>ATPase activity (GO:0016887)<br>Nucleoside triphosphatase activity (GO:0017111)                                      |
| RNA recognition motif (RRM)-containing protein | Play important roles in the processing of RNA and regulation of protein synthesis                                                                                          | At4g00830.1<br>At1g70200.1<br>At5g09880.1<br>At2g16940.1 | RNA binding (GO:0003723)<br>Chloroplast (GO:0009507)<br>Nucleic acid binding (GO:0003676)<br>mRNA processing (GO:0006397)<br>Nucleic acid binding (GO:0003676)<br>Nucleus (GO:0005634)                                  |
| AAA-type atpase family protein                 | Cell cycle regulation, protein proteolysis, disaggregation, organelle biogenesis, intracellular transport, as molecular chaperons, DNA helicase and transcription factors. | At1g43910.1<br>At5g22010.1                               | Endomembrane system (GO:0012505)<br>ATP binding (GO:0005524)<br>ATPase activity (GO:0016887)<br>DNA replication (GO:0006260)<br>Defense response (GO:0006952)<br>ATP binding (GO:0005524)<br>Intracellular (GO:0005622) |
| Met-10+ like family protein                    | Methyltransferase activity and transferase activity                                                                                                                        | At4g04670.1                                              | Cellular component unknown (GO:0005575)<br>Wybutosine biosynthetic process (GO:0031591)                                                                                                                                 |
| TCP family transcription factor                | Transcription factor                                                                                                                                                       | At3g18550.1                                              | Nucleus (GO:0005634)<br>Transcription factor activity (GO:0003700)<br>Secondary shoot formation (GO:0010223)<br>Regulation of transcription (GO:0045449)                                                                |
| Scarecrow transcription factor family protein  | Transcription factor                                                                                                                                                       | At3g46600.1<br>At3g46600.2                               | Cellular component unknown (GO:0005575)<br>Transcription factor activity (GO:0003700)<br>Regulation of transcription (GO:0045449)                                                                                       |
| SNF2 domain-containing protein                 | Transcriptional regulation, maintenance of chromosome                                                                                                                      | At1g50410.1                                              | Protein binding (GO:0005515)<br>DNA binding (GO:0003677)                                                                                                                                                                |

|                                                                               |                                                                                                                                         |                                                                                                                                                    |                                                                                                                                                             |
|-------------------------------------------------------------------------------|-----------------------------------------------------------------------------------------------------------------------------------------|----------------------------------------------------------------------------------------------------------------------------------------------------|-------------------------------------------------------------------------------------------------------------------------------------------------------------|
|                                                                               | stability during mitosis and various aspects of processing of DNA damage and post-replication daughter strand gap repair                |                                                                                                                                                    | Zinc ion binding (GO:0008270)<br>Helicase activity (GO:0004386)<br>ATP binding (GO:0005524)                                                                 |
|                                                                               |                                                                                                                                         | At5g63950.1                                                                                                                                        | DNA binding (GO:0003677)<br>ATP binding (GO:0005524)<br>Helicase activity (GO:0004386)                                                                      |
|                                                                               |                                                                                                                                         | At2g16390.1                                                                                                                                        | DNA methylation (GO:0006306)<br>Nucleic acid binding (GO:0003676)<br>ATP binding (GO:0005524)<br>Helicase activity (GO:0004386)<br>DNA binding (GO:0003677) |
|                                                                               |                                                                                                                                         | At3g42670.1                                                                                                                                        | DNA binding (GO:0003677)<br>Helicase activity (GO:0004386)<br>ATP binding (GO:0005524)                                                                      |
|                                                                               |                                                                                                                                         | At2g02090.1                                                                                                                                        | ATP binding (GO:0005524)<br>Chloroplast (GO:0009507)<br>DNA binding (GO:0003677)<br>Helicase activity (GO:0004386)                                          |
| No apical meristem (NAM) family protein                                       | DNA binding, regulation of transcription.                                                                                               | At4g28530.1<br>At1g34190.1<br>At1g32870.1                                                                                                          | Cellular component unknown (GO:0005575)<br>Transcription factor activity (GO:0003700)<br>Multicellular organismal development (GO:0007275)                  |
| KH domain-containing protein single-stranded nucleic acid-binding protein CBP | Post-transcriptional regulations, inducer of cell cycle arrest and apoptosis.                                                           | At4g26000.1                                                                                                                                        | Nucleic acid binding (GO:0003676)<br>Shoot development (GO:0048367)<br>Cellular component unknown (GO:0005575)<br>Gynoecium development (GO:0048467)        |
| F-box family protein                                                          | Ubiquitination of proteins, signal transduction and regulation of the cell cycle, microRNA-mediated gene silencing via RNA interference | At1g67390.1<br>At3g10430.1<br>At3g24760.1<br>At3g27290.1<br>At1g33020.1<br>At3g58960.1<br>At1g48400.1<br>At5g41840.1<br>At1g47340.1<br>At3g13820.1 | Cellular component unknown (GO:0005575)<br>Molecular function unknown (GO:0003674)<br>Biological process unknown (GO:0008150)                               |

|                                             |                                                                                                            |                                           |                                                                                                                                                                                                       |
|---------------------------------------------|------------------------------------------------------------------------------------------------------------|-------------------------------------------|-------------------------------------------------------------------------------------------------------------------------------------------------------------------------------------------------------|
| DNA (cytosine-5-)-methyltransferase (METII) | Methylation, DNA binding, DNA (cytosine-5-)-methyltransferase activity                                     | At4g14140.1                               | DNA methylation (GO:0006306)<br>Cellular component unknown (GO:0005575)<br>DNA (cytosine-5-)-methyltransferase activity (GO:0003886)                                                                  |
| PHD finger family protein                   | igenetic response, involved in chromatin-mediated gene regulation.                                         | At3g05670.1<br>At1g14510.1<br>At3g42790.1 | DNA binding (GO:0003677)<br>Regulation of transcription, DNA dependent (GO:0006355)                                                                                                                   |
|                                             |                                                                                                            | At3g11200.1<br>At3g11200.2                | DNA binding (GO:0003677)<br>Regulation of transcription, DNA dependent (GO:0006355)<br>Endomembrane system (GO:0012505)                                                                               |
| DNA cross-link repair protein               | DA interstrand cross-link (ICL) repair                                                                     | At1g19025.1                               | Cellular component unknown (GO:0005575)<br>Molecular function unknown (GO:0003674)<br>Biological process unknown (GO:0008150)                                                                         |
| High mobility group (HMG1/2) family protein | DA binding, architectural role in assembly of nucleoprotein complexes in a variety of biological processes | At5g23405.1<br>At3g51880.1<br>At3g51880.2 | DNA binding (GO:0003677)<br>Regulation of transcription, DNA dependent (GO:0006355)                                                                                                                   |
|                                             |                                                                                                            | At5g23420.1<br>At5g23405.2                | Nucleus (GO:0005634)<br>Chromatin (GO:0000785)<br>Transcription factor activity (GO:0003700)<br>Transcription factor activity (GO:0003700)<br>Regulation of transcription, DNA dependent (GO:0006355) |

Note: The proteins with transcription factor activity or transcriptional regulator activity and proteins involved in DNA dependent regulation of transcription were classified into the same group with roles in transcriptional regulation. Likewise, proteins having ubiquitin-protein ligase activity, small conjugating protein ligase activity, protein transporter activity and protein phosphorylation activity were categorized as members of a group regulating protein modifications. The proteins with DNA methylation activity or histone deacetylase activity were categorized in chromatin modification. Similarly, proteins having nucleic acid and nucleotide binding ability or mismatch repair activity were grouped into DNA repair family proteins.

**Table S3 GO enrichment analysis on target proteins**

| <b>Process</b>             | <b>Gene numbers</b> | <b>%</b> |
|----------------------------|---------------------|----------|
| Transcriptional regulation | 40                  | 34.18    |
| Regulation of translation  | 1                   | 0.85     |
| Protein modification       | 16                  | 13.67    |
| DNA repair                 | 10                  | 8.54     |
| Chromatin modification     | 9                   | 7.69     |
| Unknown                    | 41                  | 35.04    |
| Total                      | 117                 |          |

**Table S4 miRNA and primer sequences**

|               |                |                                                         |
|---------------|----------------|---------------------------------------------------------|
| <b>miR408</b> | miRNA sequence | AUGCACUGCCUCUUCCCUGGC                                   |
|               | RT primer      | GTCGTATCCAGTGCAGGGTCCGAGGTATTTCGCACTG<br>GATACGACGCCAGG |
|               | Forward primer | CTGCGTTATGCACTGCCTCTTC                                  |
| <b>miR399</b> | miRNA sequence | UGCCAAAGGAGAUUUGCCCUG                                   |
|               | RT primer      | GTCGTATCCAGTGCAGGGTCCGAGGTATTTCGCACTG<br>GATACGACCAGGGC |
|               | Forward primer | CTGCGTTTGCCAAAGGAGATTT                                  |
| <b>miR398</b> | miRNA sequence | UGUGUUCUCAGGUCACCCCUU                                   |
|               | RT primer      | GTCGTATCCAGTGCAGGGTCCGAGGTATTTCGCACTG<br>GATACGACCAGGGG |
|               | Forward primer | CTGCGTTTGTGTTCTCAGGTCA                                  |
| <b>miR397</b> | miRNA sequence | UCAUUGAGUGCAGCGUUGAUG                                   |
|               | RT primer      | GTCGTATCCAGTGCAGGGTCCGAGGTATTTCGCACTG<br>GATACGACCATCAA |
|               | Forward primer | CTGCGTTTCATTGAGTGCAGCG                                  |
| <b>miR395</b> | miRNA sequence | GUGAAGUGUUUGGGGGAACUC                                   |
|               | RT primer      | GTCGTATCCAGTGCAGGGTCCGAGGTATTTCGCACTG<br>GATACGACGAGTTC |
|               | Forward primer | CTGCGTTGTGAAGTGTTTGGGG                                  |
| <b>miR319</b> | miRNA sequence | UUGGACUGAAGGGAGCUCCCU                                   |
|               | RT primer      | GTCGTATCCAGTGCAGGGTCCGAGGTATTTCGCACTG<br>GATACGACGGGAGC |
|               | Forward primer | CTGCGTTTTGGACTGAAGGGA                                   |
| <b>miR169</b> | miRNA sequence | CAGCCAAGGAUGACUUGCCGA                                   |
|               | RT primer      | GTCGTATCCAGTGCAGGGTCCGAGGTATTTCGCACTG<br>GATACGACCCGGCA |
|               | Forward primer | CTGCGTTCAGCCAAGGATGACT                                  |
| <b>miR167</b> | miRNA sequence | UGAAGCUGCCAGCAUGAUCUA                                   |
